# Supplementary material
Source: Springer Nature journal article supplement (https://www.springermedizin.de/resource/supplementary/13256_2013_2740_MOESM3_ESM.pdf/9651334)

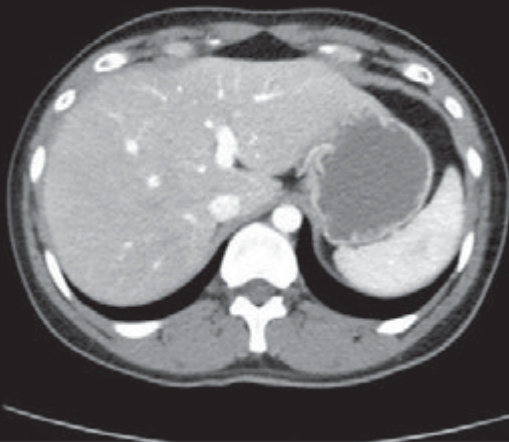

Post treatment follow-up CT scan shows complete resolution of the periportal lymphedema

Supplement: MOESM3 [file 9651334]
